# Supplementary material
Source: Oxford University Press journal article supplement (http://www.oxfordjournals.org/our_journals/ejechocard/supplements/vol1_2_ix.pdf)
Supplement: Supplementary file 1 [file vol1_2_ix.pdf]

# Statistics

By Country

| Country                        | Submission |      | %       |         | Acceptance |      | %       |         |
|--------------------------------|------------|------|---------|---------|------------|------|---------|---------|
|                                | 1999       | 2000 | 1999    | 2000    | 1999       | 2000 | 1999    | 2000    |
| Albania                        | 0          | 5    | 0.12%   | 0.59%   | 0          | 4    | 0.00%   | 0.88%   |
| Algeria                        | 0          | 1    | 0.00%   | 0.12%   | 0          | 1    | 0.00%   | 0.22%   |
| Armenia                        | 0          | 3    | 0.00%   | 0.36%   | 0          | 1    | 0.00%   | 0.22%   |
| Argentina                      | 1          | 0    | 0.18%   | 0.00%   | 1          | 0    | 0.25%   | 0.00%   |
| Australia                      | 7          | 0    | 1.25%   | 0.00%   | 6          | 0    | 1.53%   | 0.00%   |
| Austria                        | 10         | 8    | 1.79%   | 0.95%   | 9          | 7    | 2.29%   | 1.55%   |
| Belarus                        | 2          | 0    | 0.36%   | 0.00%   | 1          | 0    | 0.25%   | 0.00%   |
| Belgium                        | 11         | 30   | 1.97%   | 3.56%   | 10         | 24   | 2.54%   | 5.30%   |
| Bosnia Herzegovina             | 2          | 0    | 0.36%   | 0.00%   | 2          | 0    | 0.51%   | 0.00%   |
| Brazil                         | 6          | 6    | 1.08%   | 0.71%   | 5          | 5    | 1.27%   | 1.10%   |
| Bulgaria                       | 6          | 2    | 1.08%   | 0.24%   | 3          | 2    | 0.76%   | 0.44%   |
| Croatia                        | 0          | 4    | 0.00%   | 0.47%   | 0          | 2    | 0.00%   | 0.44%   |
| Czech Republic                 | 5          | 10   | 0.90%   | 1.19%   | 3          | 7    | 0.76%   | 1.55%   |
| Denmark                        | 5          | 6    | 0.90%   | 0.71%   | 5          | 6    | 1.27%   | 1.32%   |
| Egypt                          | 7          | 1    | 1.25%   | 0.12%   | 6          | 1    | 1.53%   | 0.22%   |
| Estonia                        | 1          | 0    | 0.18%   | 0.00%   | 0          | 0    | 0.00%   | 0.00%   |
| Finland                        | 0          | 2    | 0.00%   | 0.24%   | 0          | 2    | 0.00%   | 0.44%   |
| Former Yugoslav Rep. Macedonia | 1          | 1    | 0.18%   | 0.12%   | 0          | 0    | 0.00%   | 0.00%   |
| France                         | 19         | 32   | 3.41%   | 3.80%   | 16         | 18   | 4.07%   | 3.97%   |
| Georgia                        | 3          | 4    | 0.54%   | 0.47%   | 0          | 1    | 0.00%   | 0.22%   |
| Germany                        | 52         | 60   | 9.32%   | 7.12%   | 42         | 37   | 10.69%  | 8.17%   |
| Greece                         | 28         | 44   | 5.02%   | 5.22%   | 22         | 32   | 5.60%   | 7.06%   |
| Hong Kong                      | 0          | 2    | 0.00%   | 0.24%   | 0          | 2    | 0.00%   | 0.44%   |
| Hungary                        | 14         | 19   | 2.51%   | 2.25%   | 8          | 6    | 2.04%   | 1.32%   |
| India                          | 1          | 0    | 0.18%   | 0.00%   | 1          | 0    | 0.25%   | 0.00%   |
| Ireland                        | 0          | 6    | 0.00%   | 0.71%   | 0          | 3    | 0.00%   | 0.66%   |
| Israel                         | 4          | 10   | 0.72%   | 1.19%   | 0          | 5    | 0.00%   | 1.10%   |
| Italy                          | 69         | 121  | 12.37%  | 14.35%  | 55         | 66   | 13.99%  | 14.57%  |
| Japan                          | 1          | 0    | 0.18%   | 0.00%   | 1          | 0    | 0.25%   | 0.00%   |
| Korea, Republic of             | 3          | 6    | 0.54%   | 0.71%   | 3          | 2    | 0.76%   | 0.44%   |
| Kyrgyzstan                     | 2          | 0    | 0.36%   | 0.00%   | 0          | 0    | 0.00%   | 0.00%   |
| Lithuania                      | 3          | 2    | 0.54%   | 0.24%   | 3          | 2    | 0.76%   | 0.44%   |
| Martinique                     | 0          | 2    | 0.00%   | 0.24%   | 0          | 0    | 0.00%   | 0.00%   |
| Norway                         | 2          | 10   | 0.36%   | 1.19%   | 2          | 8    | 0.51%   | 1.77%   |
| Philippines                    | 0          | 1    | 0.00%   | 0.12%   | 0          | 0    | 0.00%   | 0.00%   |
| Poland                         | 28         | 62   | 5.02%   | 7.35%   | 14         | 30   | 3.56%   | 6.62%   |
| Portugal                       | 32         | 56   | 5.73%   | 6.64%   | 13         | 17   | 3.31%   | 3.75%   |
| Romania                        | 24         | 35   | 4.30%   | 4.15%   | 15         | 13   | 3.82%   | 2.87%   |
| Russian Federation             | 3          | 20   | 0.54%   | 2.37%   | 2          | 10   | 0.51%   | 2.21%   |
| Slovakia                       | 4          | 5    | 0.72%   | 0.59%   | 3          | 1    | 0.76%   | 0.22%   |
| Slovenia                       | 1          | 2    | 0.18%   | 0.24%   | 1          | 1    | 0.25%   | 0.22%   |
| Spain                          | 22         | 34   | 3.94%   | 4.03%   | 12         | 17   | 3.05%   | 3.75%   |
| Sweden                         | 14         | 10   | 2.51%   | 1.19%   | 8          | 4    | 2.04%   | 0.88%   |
| Switzerland                    | 4          | 10   | 0.72%   | 1.19%   | 2          | 7    | 0.51%   | 1.55%   |
| The Netherlands                | 15         | 18   | 2.69%   | 2.14%   | 14         | 11   | 3.56%   | 2.43%   |
| Turkey                         | 51         | 78   | 9.14%   | 9.25%   | 31         | 28   | 7.89%   | 6.18%   |
| Turkmenistan                   | 1          | 0    | 0.18%   | 0.00%   | 0          | 0    | 0.00%   | 0.00%   |
| Ukraine                        | 5          | 4    | 0.90%   | 0.47%   | 3          | 1    | 0.76%   | 0.22%   |
| United Kingdom                 | 38         | 30   | 6.81%   | 3.56%   | 29         | 16   | 7.38%   | 3.53%   |
| United States of America       | 18         | 42   | 3.23%   | 4.98%   | 15         | 30   | 3.82%   | 6.62%   |
| Uzbekistan                     | 2          | 6    | 0.36%   | 0.71%   | 1          | 2    | 0.25%   | 0.44%   |
| Yugoslavia                     | 31         | 33   | 5.56%   | 3.91%   | 26         | 21   | 6.62%   | 4.64%   |
|                                | 558        | 843  | 100.00% | 100.00% | 393        | 453  | 100.00% | 100.00% |

# Statistics

By Submission

| Country                        | Submission |            | %              |                | Acceptance |            | %              |                |
|--------------------------------|------------|------------|----------------|----------------|------------|------------|----------------|----------------|
|                                | 1999       | 2000       | 1999           | 2000           | 1999       | 2000       | 1999           | 2000           |
| Italy                          | 69         | <b>121</b> | 12.37%         | <b>14.35%</b>  | 55         | <b>66</b>  | 13.99%         | <b>14.57%</b>  |
| Turkey                         | 51         | <b>78</b>  | 9.14%          | <b>9.25%</b>   | 31         | <b>28</b>  | 7.89%          | <b>6.18%</b>   |
| Poland                         | 28         | <b>62</b>  | 5.02%          | <b>7.35%</b>   | 14         | <b>30</b>  | 3.56%          | <b>6.62%</b>   |
| Germany                        | 52         | <b>60</b>  | 9.32%          | <b>7.12%</b>   | 42         | <b>37</b>  | 10.69%         | <b>8.17%</b>   |
| Portugal                       | 32         | <b>56</b>  | 5.73%          | <b>6.64%</b>   | 13         | <b>17</b>  | 3.31%          | <b>3.75%</b>   |
| Greece                         | 28         | <b>44</b>  | 5.02%          | <b>5.22%</b>   | 22         | <b>32</b>  | 5.60%          | <b>7.06%</b>   |
| United States of America       | 18         | <b>42</b>  | 3.23%          | <b>4.98%</b>   | 15         | <b>30</b>  | 3.82%          | <b>6.62%</b>   |
| Romania                        | 24         | <b>35</b>  | 4.30%          | <b>4.15%</b>   | 15         | <b>13</b>  | 3.82%          | <b>2.87%</b>   |
| Spain                          | 22         | <b>34</b>  | 3.94%          | <b>4.03%</b>   | 12         | <b>17</b>  | 3.05%          | <b>3.75%</b>   |
| Yugoslavia                     | 31         | <b>33</b>  | 5.56%          | <b>3.91%</b>   | 26         | <b>21</b>  | 6.62%          | <b>4.64%</b>   |
| France                         | 19         | <b>32</b>  | 3.41%          | <b>3.80%</b>   | 16         | <b>18</b>  | 4.07%          | <b>3.97%</b>   |
| Belgium                        | 11         | <b>30</b>  | 1.97%          | <b>3.56%</b>   | 10         | <b>24</b>  | 2.54%          | <b>5.30%</b>   |
| United Kingdom                 | 38         | <b>30</b>  | 6.81%          | <b>3.56%</b>   | 29         | <b>16</b>  | 7.38%          | <b>3.53%</b>   |
| Russian Federation             | 3          | <b>20</b>  | 0.54%          | <b>2.37%</b>   | 2          | <b>10</b>  | 0.51%          | <b>2.21%</b>   |
| Hungary                        | 14         | <b>19</b>  | 2.51%          | <b>2.25%</b>   | 8          | <b>6</b>   | 2.04%          | <b>1.32%</b>   |
| The Netherlands                | 15         | <b>18</b>  | 2.69%          | <b>2.14%</b>   | 14         | <b>11</b>  | 3.56%          | <b>2.43%</b>   |
| Czech Republic                 | 5          | <b>10</b>  | 0.90%          | <b>1.19%</b>   | 3          | <b>7</b>   | 0.76%          | <b>1.55%</b>   |
| Israel                         | 4          | <b>10</b>  | 0.72%          | <b>1.19%</b>   | 0          | <b>5</b>   | 0.00%          | <b>1.10%</b>   |
| Norway                         | 2          | <b>10</b>  | 0.36%          | <b>1.19%</b>   | 2          | <b>8</b>   | 0.51%          | <b>1.77%</b>   |
| Sweden                         | 14         | <b>10</b>  | 2.51%          | <b>1.19%</b>   | 8          | <b>4</b>   | 2.04%          | <b>0.88%</b>   |
| Switzerland                    | 4          | <b>10</b>  | 0.72%          | <b>1.19%</b>   | 2          | <b>7</b>   | 0.51%          | <b>1.55%</b>   |
| Austria                        | 10         | <b>8</b>   | 1.79%          | <b>0.95%</b>   | 9          | <b>7</b>   | 2.29%          | <b>1.55%</b>   |
| Brazil                         | 6          | <b>6</b>   | 1.08%          | <b>0.71%</b>   | 5          | <b>5</b>   | 1.27%          | <b>1.10%</b>   |
| Denmark                        | 5          | <b>6</b>   | 0.90%          | <b>0.71%</b>   | 5          | <b>6</b>   | 1.27%          | <b>1.32%</b>   |
| Ireland                        | 0          | <b>6</b>   | 0.00%          | <b>0.71%</b>   | 0          | <b>3</b>   | 0.00%          | <b>0.66%</b>   |
| Korea, Republic of             | 3          | <b>6</b>   | 0.54%          | <b>0.71%</b>   | 3          | <b>2</b>   | 0.76%          | <b>0.44%</b>   |
| Uzbekistan                     | 2          | <b>6</b>   | 0.36%          | <b>0.71%</b>   | 1          | <b>2</b>   | 0.25%          | <b>0.44%</b>   |
| Albania                        | 0          | <b>5</b>   | 0.00%          | <b>0.59%</b>   | 0          | <b>4</b>   | 0.00%          | <b>0.88%</b>   |
| Slovakia                       | 4          | <b>5</b>   | 0.72%          | <b>0.59%</b>   | 3          | <b>1</b>   | 0.76%          | <b>0.22%</b>   |
| Croatia                        | 0          | <b>4</b>   | 0.00%          | <b>0.47%</b>   | 0          | <b>2</b>   | 0.00%          | <b>0.44%</b>   |
| Georgia                        | 3          | <b>4</b>   | 0.54%          | <b>0.47%</b>   | 0          | <b>1</b>   | 0.00%          | <b>0.22%</b>   |
| Ukraine                        | 5          | <b>4</b>   | 0.90%          | <b>0.47%</b>   | 3          | <b>1</b>   | 0.76%          | <b>0.22%</b>   |
| Armenia                        | 0          | <b>3</b>   | 0.00%          | <b>0.36%</b>   | 0          | <b>1</b>   | 0.00%          | <b>0.22%</b>   |
| Bulgaria                       | 6          | <b>2</b>   | 1.08%          | <b>0.24%</b>   | 3          | <b>2</b>   | 0.76%          | <b>0.44%</b>   |
| Finland                        | 0          | <b>2</b>   | 0.00%          | <b>0.24%</b>   | 0          | <b>2</b>   | 0.00%          | <b>0.44%</b>   |
| Hong Kong                      | 0          | <b>2</b>   | 0.00%          | <b>0.24%</b>   | 0          | <b>2</b>   | 0.00%          | <b>0.44%</b>   |
| Lithuania                      | 3          | <b>2</b>   | 0.54%          | <b>0.24%</b>   | 3          | <b>2</b>   | 0.76%          | <b>0.44%</b>   |
| Martinique                     | 0          | <b>2</b>   | 0.00%          | <b>0.24%</b>   | 0          | <b>0</b>   | 0.00%          | <b>0.00%</b>   |
| Slovenia                       | 1          | <b>2</b>   | 0.18%          | <b>0.24%</b>   | 1          | <b>1</b>   | 0.25%          | <b>0.22%</b>   |
| Algeria                        | 0          | <b>1</b>   | 0.00%          | <b>0.12%</b>   | 0          | <b>1</b>   | 0.00%          | <b>0.22%</b>   |
| Egypt                          | 7          | <b>1</b>   | 1.25%          | <b>0.12%</b>   | 6          | <b>1</b>   | 1.53%          | <b>0.22%</b>   |
| Former Yugoslav Rep. Macedonia | 1          | <b>1</b>   | 0.18%          | <b>0.12%</b>   | 0          | <b>0</b>   | 0.00%          | <b>0.00%</b>   |
| Philippines                    | 0          | <b>1</b>   | 0.00%          | <b>0.12%</b>   | 0          | <b>0</b>   | 0.00%          | <b>0.00%</b>   |
| Argentina                      | 1          | <b>0</b>   | 0.18%          | <b>0.00%</b>   | 1          | <b>0</b>   | 0.25%          | <b>0.00%</b>   |
| Australia                      | 7          | <b>0</b>   | 1.25%          | <b>0.00%</b>   | 6          | <b>0</b>   | 1.53%          | <b>0.00%</b>   |
| Belarus                        | 2          | <b>0</b>   | 0.36%          | <b>0.00%</b>   | 1          | <b>0</b>   | 0.25%          | <b>0.00%</b>   |
| Bosnia Herzegovina             | 2          | <b>0</b>   | 0.36%          | <b>0.00%</b>   | 2          | <b>0</b>   | 0.51%          | <b>0.00%</b>   |
| Estonia                        | 1          | <b>0</b>   | 0.18%          | <b>0.00%</b>   | 0          | <b>0</b>   | 0.00%          | <b>0.00%</b>   |
| India                          | 1          | <b>0</b>   | 0.18%          | <b>0.00%</b>   | 1          | <b>0</b>   | 0.25%          | <b>0.00%</b>   |
| Japan                          | 1          | <b>0</b>   | 0.18%          | <b>0.00%</b>   | 1          | <b>0</b>   | 0.25%          | <b>0.00%</b>   |
| Kyrgyzstan                     | 2          | <b>0</b>   | 0.36%          | <b>0.00%</b>   | 0          | <b>0</b>   | 0.00%          | <b>0.00%</b>   |
| Turkmenistan                   | 1          | <b>0</b>   | 0.18%          | <b>0.00%</b>   | 0          | <b>0</b>   | 0.00%          | <b>0.00%</b>   |
|                                | <b>558</b> | <b>843</b> | <b>100.00%</b> | <b>100.00%</b> | <b>393</b> | <b>453</b> | <b>100.00%</b> | <b>100.00%</b> |
